# Supplementary material for: Rational drug repositioning guided by an integrated pharmacological network of protein, disease and drug
Source: PubMed Central journal article supplement (PMC3443412; doi:10.1186/1752-0509-6-80), 2012-07-02
Supplement: 1752-0509-6-80-S1.pdf [file 1752-0509-6-80-S1.pdf]

**Figure S1. Design of shared neighborhood score algorithm**

$$\text{SN Score} = f(\text{Share\_Count} + \text{Share\_Weight})$$

Share weight = Sum of connecting probability

Share weight  


$$\begin{aligned} S_{ij} &= S_{ij}^{(0)} + S_{ij}^{(1)} + S_{ij}^{(2)} \\ &= \sum_k (a_{ik} + P(S_{ik}^{(0)})\delta_{a_{ik},0})(a_{kj} + P(S_{kj}^{(0)})\delta_{a_{kj},0}) \end{aligned}$$

where,

$$S_{ij}^{(0)} = \sum_k a_{ik} a_{kj}$$

$$S_{ij}^{(1)} = \sum_k (a_{ik} P(S_{kj}^{(0)})\delta_{a_{kj},0} + a_{kj} P(S_{ik}^{(0)})\delta_{a_{ik},0})$$

$$S_{ij}^{(2)} = \sum_k P(S_{ik}^{(0)})\delta_{a_{ik},0} P(S_{kj}^{(0)})\delta_{a_{kj},0}$$

$a_{ik}=1$  and  $\delta_{a_{ik},0}=0$  if the link between  $i$  and  $k$  is real

$a_{ik}=0$  and  $\delta_{a_{ik},0}=1$  if the link is virtual

$P(x)$  = connecting probability function

$$P_{(x)} = \frac{(\text{number of connected pairs})}{(\text{number of pairs})} \text{ for } n = 1, 2, \dots$$

$$P_{(x)} = 0 \text{ for } x = 0$$

Logistic function is used for non-linear regression.

$$f(x) = \frac{1}{1 + e^{a+bx}}$$

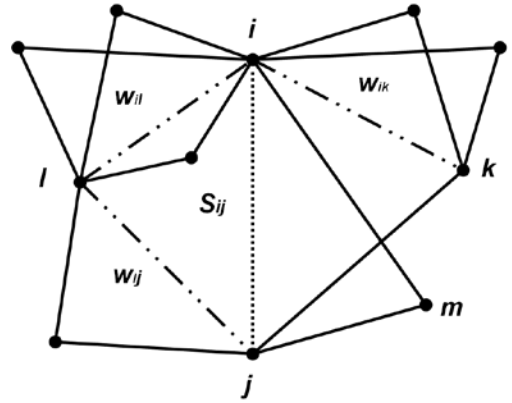

**Figure S2. Non-linear regression results for extracting connecting probability function**

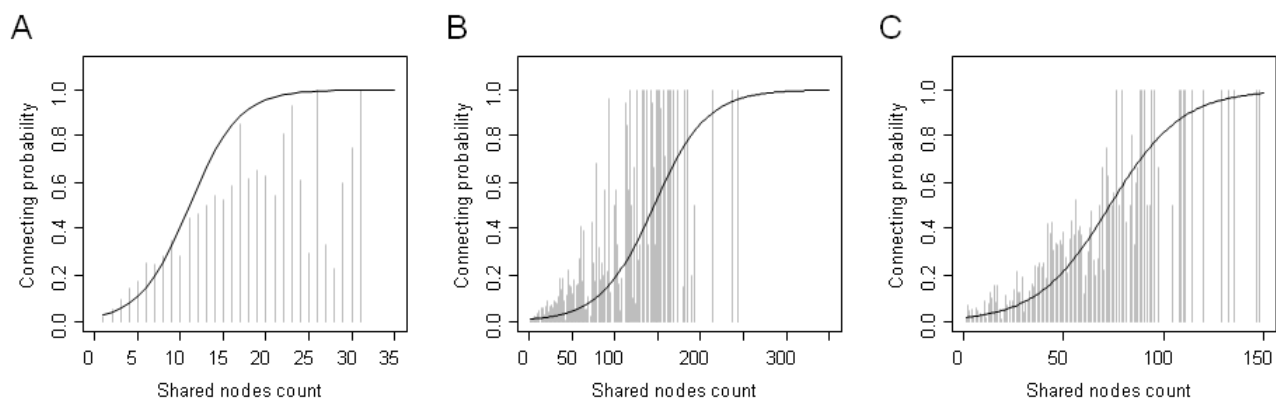

Non-linear connecting probability model based on the number of nodes commonly shared between two nodes. (A) Drug-Protein. (B) Drug-Disease. (C) Protein-Disease.

**Table S1. Model coefficient values from non-linear regression for connecting probability function**

| Model Coefficient | Drug-Protein | Drug-Disease | Protein-Disease |
|-------------------|--------------|--------------|-----------------|
| a                 | 3.87         | 4.67         | 4.03            |
| b                 | -0.35        | -0.03        | -0.06           |

**Figure S3. Connecting probability model for SN score**

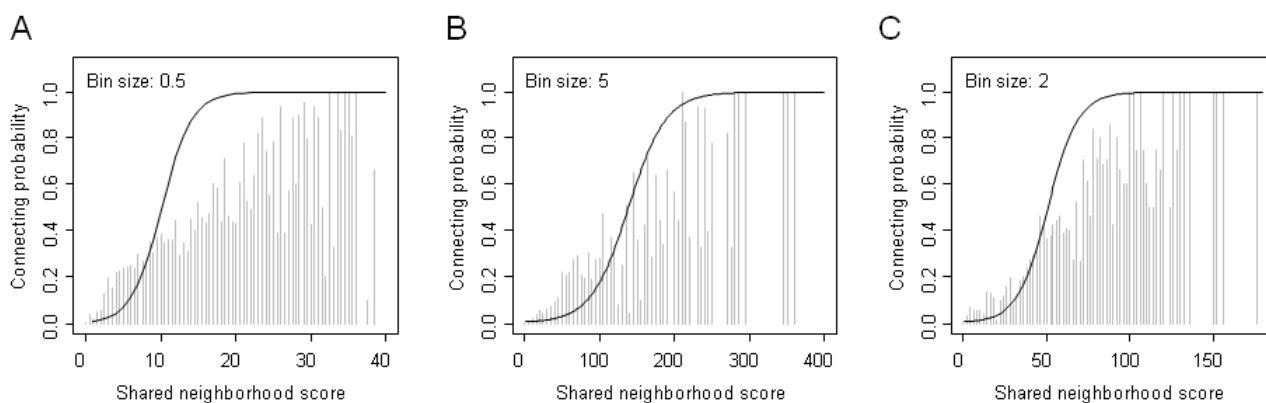

The shared neighborhood score is proportional to the number of shared neighborhood nodes. As the amount of data is not evenly distributed on each relation category, even if two different types of relations have identical score, their connecting possibility can't be regarded as identical. Therefore the shared neighborhood score is normalized using connecting probability function. (A) Drug-Protein. (B) Drug-Disease. (C) Protein-Disease.

**Table S2. Model coefficient values from connecting probability model for SN score**

| Model Coefficient | Drug-Protein | Drug-Disease | Protein-Disease |
|-------------------|--------------|--------------|-----------------|
| a                 | 5.09         | 5.62         | 5.53            |
| b                 | -0.50        | -0.11        | -0.04           |

**Table S3. Inferred SCC drug candidates**

Twenty eight SCC drug candidates which satisfy four criteria; 1) inferred by SNS algorithm 2) FDA approved drugs 3) non-cancer drugs 4) directly linked to cancer-related proteins.

| Name                   | Cancer-related GeneID | Cancer-related GeneSymbol |
|------------------------|-----------------------|---------------------------|
| MIRTAZAPINE            | 3157                  | HMGCS1                    |
| ZONISAMIDE             | 7364                  | UGT2B7                    |
| ARGATROBAN             | 2147                  | F2                        |
| GANCICLOVIR            | 6580                  | SLC22A1                   |
| ACYCLOVIR              | 6580                  | SLC22A1                   |
| CLADRIBINE             | 9154                  | SLC28A1                   |
| BENZTHIAZIDE           | 760                   | CA2                       |
| HYDROCHLOROTHIAZIDE    | 760                   | CA2                       |
| CHLOROTHIAZIDE         | 760                   | CA2                       |
| DIAZOXIDE              | 3767                  | KCNJ11                    |
| DROPERIDOL             | 3757                  | KCNH2                     |
| FLURBIPROFEN           | 8856                  | NR1I2                     |
| GLIMEPIRIDE            | 8856                  | NR1I2                     |
| GLIPIZIDE              | 1559                  | CYP2C9                    |
| METHYLDOPA             | 1312                  | COMT                      |
| MEPROBAMATE            | 5581                  | PRKCE                     |
| MYCOPHENOLATE MOFETIL  | 54576                 | UGT1A8                    |
| AZITHROMYCIN           | 1813                  | DRD2                      |
| PINDOLOL               | 155                   | ADRB3                     |
| FLUPHENAZINE DECANOATE | 3351                  | HTR1B                     |
| PROCHLORPERAZINE       | 1813                  | DRD2                      |
| LATANOPROST            | 5737                  | PTGFR                     |
| NALOXONE               | 8856                  | NR1I2                     |
| NALBUPHINE             | 4985                  | OPRD1                     |
| CABERGOLINE            | 1813                  | DRD2                      |
| TOBRAMYCIN             | 4549                  | RNR1                      |
| ZAFIRLUKAST            | 10800                 | CYSLTR1                   |
| NATEGLINIDE            | 1559                  | CYP2C9                    |
